# Supplementary material
Source: ML conference proceedings conference paper supplement (https://openaccess.thecvf.com/content/CVPR_2020/html/Gu_Improving_the_Robustness_CVPR_2020_paper.html)
Supplement: Supplementary file 1 [file Gu_Improving_the_Robustness_CVPR_2020_supplemental.pdf]

# Supplementary Material

PaperID 9208

## Appx. A: Proof of Equation 6

Given that there are  $K$  iterations and the classification loss of is  $\mathcal{L}(\mathbf{y}, \mathbf{t})$ , where  $\mathbf{y} = (\|\mathbf{v}_1^{(K)}\|, \dots, \|\mathbf{v}_M^{(K)}\|)$  is the prediction and  $\mathbf{t}$  the target, the gradients through the routing procedure are

$$\frac{\partial \mathcal{L}}{\partial \hat{\mathbf{u}}_{m|i}} = \frac{\partial \mathcal{L}}{\partial \mathbf{v}_m^{(K)}} \frac{\partial \mathbf{v}_m^{(K)}}{\partial \mathbf{s}_m^{(K)}} c_{im}^{(K)} + \sum_{j=1}^M \frac{\partial \mathcal{L}}{\partial \mathbf{v}_j^{(K)}} \frac{\partial \mathbf{v}_j^{(K)}}{\partial \mathbf{s}_j^{(K)}} \hat{\mathbf{u}}_{j|i} \frac{\partial c_{ij}^{(K)}}{\partial \hat{\mathbf{u}}_{m|i}} \quad (1)$$

As described in the paper, the coupling coefficients of the Digit Layer are computed as

$$c_{ij}^{(t+1)} = \frac{\exp(B_{ij} + \sum_{r=1}^t \mathbf{v}_j^{(r)} \hat{\mathbf{u}}_{j|i})}{\sum_k \exp(b_{ik} + \sum_{r=1}^t \mathbf{v}_k^{(r)} \hat{\mathbf{u}}_{k|i})} = \frac{\exp(B_{ij})}{\sum_k \exp(B_{ik})} \quad (2)$$

where the superscript  $t$  is the index of an iteration, and  $B_{ik} = b_{ik} + \sum_{r=1}^t \mathbf{v}_k^{(r)} \hat{\mathbf{u}}_{k|i}$ .

When unrolling the routing procedure (a factor of the second term in Equation 1), we have

$$\begin{aligned} \frac{\partial c_{ij}^{(K)}}{\partial \hat{\mathbf{u}}_{m|i}} &= c_{ij}^{(K)} (1 - c_{ij}^{(K)}) \frac{\partial B_{ij}^{(K-1)}}{\partial \hat{\mathbf{u}}_{m|i}} \\ &+ \sum_{k=1 \& k \neq j}^M c_{ij}^{(K)} c_{ik}^{(K)} \frac{\partial B_{ij}^{(K-1)}}{\partial \hat{\mathbf{u}}_{m|i}} \end{aligned} \quad (3)$$

Since  $c_{ik} \in (0, 1)$ , by unrolling the above formulation further, we have  $\frac{\partial c_{ij}^{(K)}}{\partial \hat{\mathbf{u}}_{m|i}} \approx 0$ .

At end of the training process, the coupling coefficients are polarized. There are close either to 1 or to 0. When  $c_{im}$  is close to 1, the second term in Equation 1 can be ignored. We have

$$\frac{\partial \mathcal{L}}{\partial \hat{\mathbf{u}}_{m|i}} \approx \frac{\partial \mathcal{L}}{\partial \mathbf{v}_m^{(K)}} \frac{\partial \mathbf{v}_m^{(K)}}{\partial \mathbf{s}_m^{(K)}} c_{im}^{(K)} \quad (4)$$

When  $c_{im}$  is close to 0, We have

$$\begin{aligned} \frac{\partial \mathcal{L}}{\partial \hat{\mathbf{u}}_{m|i}} &\approx \frac{\partial \mathcal{L}}{\partial \mathbf{v}_m^{(K)}} \frac{\partial \mathbf{v}_m^{(K)}}{\partial \mathbf{s}_m^{(K)}} c_{im}^{(K)} \\ &+ \frac{\partial \mathcal{L}}{\partial \mathbf{v}_m^{(K)}} \frac{\partial \mathbf{v}_m^{(K)}}{\partial \mathbf{s}_m^{(K)}} \hat{\mathbf{u}}_{m|i} c_{im}^{(K)} (1 - c_{im}^{(K)}) \frac{\partial B_{im}^{(K-1)}}{\partial \hat{\mathbf{u}}_{m|i}} \\ &= \frac{\partial \mathcal{L}}{\partial \mathbf{v}_m^{(K)}} \frac{\partial \mathbf{v}_m^{(K)}}{\partial \mathbf{s}_m^{(K)}} c_{im}^{(K)} (1 + \hat{\mathbf{u}}_{m|i} (1 - c_{im}^{(K)}) \frac{\partial B_{im}^{(K-1)}}{\partial \hat{\mathbf{u}}_{m|i}}) \\ &= C \cdot \frac{\partial \mathcal{L}}{\partial \mathbf{v}_m^{(K)}} \frac{\partial \mathbf{v}_m^{(K)}}{\partial \mathbf{s}_m^{(K)}} c_{im}^{(K)} \end{aligned} \quad (5)$$

where  $C$  is a constant for the given  $\hat{\mathbf{u}}_{m|i}$ . The constant can be absorbed into the learning rate when propagated back to scale the gradients of network parameters.

## Appx. B: Experimental Setting of CapsNet

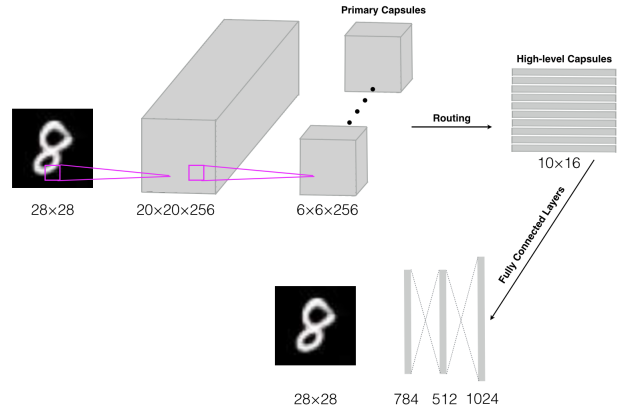

Figure 1. The Architecture of CapsNet used in the Experiments.

|                       |        |
|-----------------------|--------|
| Training batch size   | 128    |
| Training epochs       | 100    |
| Learning rate         | 0.001  |
| Routing iterations    | 3      |
| Reconstruction weight | 0.0005 |
| Optimizer             | Adam   |

Table 1. The Hyper-parameters of the Training Process.

## Appx. C: Visualizing Computational Graphs

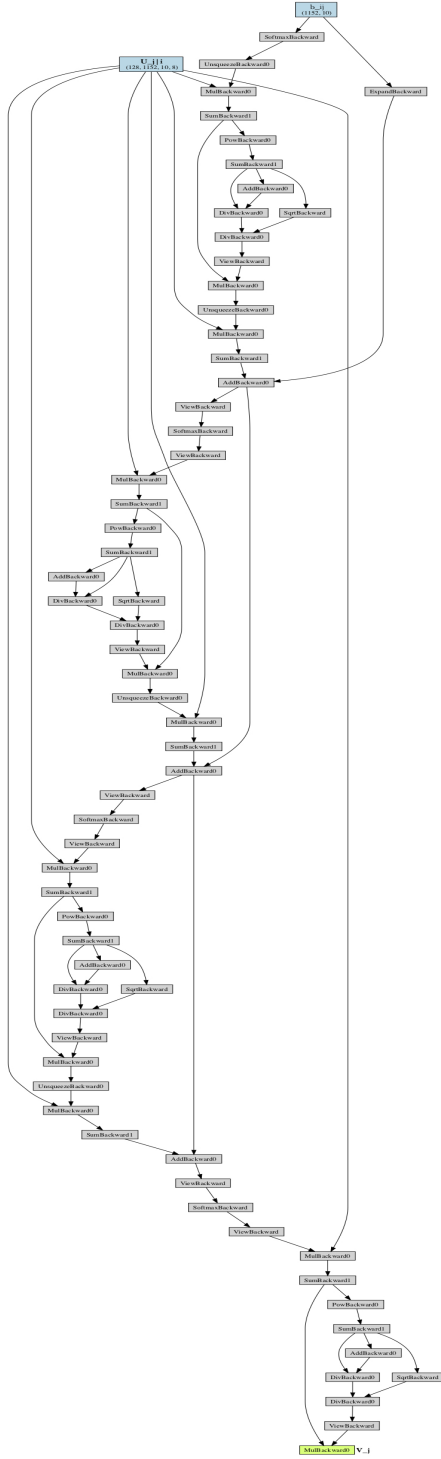

Figure 2. The computational graph of computing  $\frac{\partial v_j}{\partial \hat{\mathbf{u}}_{j|i}}$  where the coupling coefficients are treated as a function value of  $\hat{\mathbf{u}}_{j|i}$ . The gradients are propagated through the iterative routing iterations.

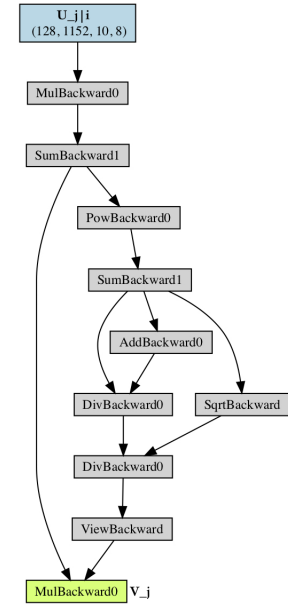

Figure 3. The computational graph of computing  $\frac{\partial v_j}{\partial \hat{\mathbf{u}}_{j|i}}$  where the coupling coefficients are treated as constants in gradient backpropagation.
